# Supplementary material
Source: PubMed Central journal article supplement (PMC3811184)
Supplement: AEM.01692-13_zam999104787so1.pdf [file AEM.01692-13_zam999104787so1.pdf]

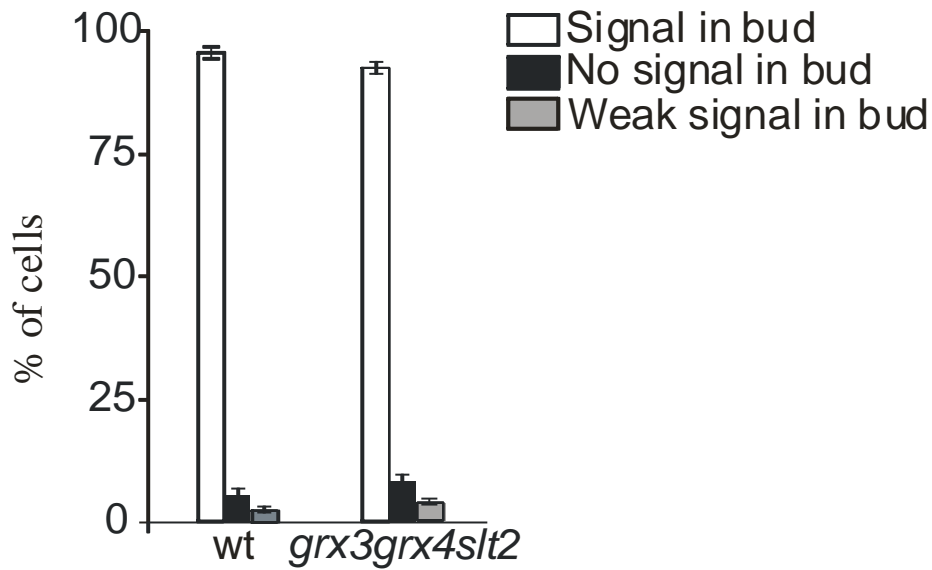

1  
2  
3 **Fig. S1.** The mutant *grx3grx4slt2* does not present any evident defect in vacuole  
4 heritage. Wt and *grx3grx4slt2* strains were exponentially grown at 25°C in SD medium.  
5 Five ml aliquots were added with alpha factor to a final concentration of 8 mg/ml.  
6 Cultures were allowed to grow for 4 hours at 25°C. Upon this period of time, all the  
7 cells were blocked in G1 as shmoos. Subsequently, vacuoles were stained with the dye  
8 FM4-64, as described in Material and Methods. Upon the incubation with the dye, cells  
9 were immediately washed four times with fresh SD medium. Upon the last wash, pellets  
10 were resuspended in fresh SD medium and incubated at 25°C for 8 hours. Cells were  
11 synchronised in G1 and bud emergence was recorded until the next cell division. We  
12 screened vacuole segregation to daughter cells in 1.000 cells. This experiment was  
13 repeated three times, obtaining equivalent results. Histograms represent the percentage  
14 of cells with signal, weak signal or no signal in the bud.

15  
16  
17
